# Supplementary material for: Cyclopaldic Acid, the Main Phytotoxic Metabolite of Diplodia cupressi, Induces Programmed Cell Death and Autophagy in Arabidopsis thaliana
Source: MDPI journal article supplement (doi:10.3390/toxins14070474), 2022-07-11
Supplement: s1 [file s1]

## Article

# Cyclopaldic Acid, the Main Phytotoxic Metabolite of *Diplodia cupressi*, Induces Programmed Cell Death and Autophagy in *Arabidopsis thaliana*

Simone Samperna, Marco Masi, Maurizio Vurro, Antonio Evidente and Mauro Marra

**Table S1.** List of oligonucleotides used in qRT-PCR analysis of defense-related gene expression of *A. thaliana* leaves treated with CA.

| Gene         | Primer sense 5'-3'       | Primer antisense 5'-3' |
|--------------|--------------------------|------------------------|
| WRKY30       | GAAGCCCCAAGAGCGATGAT     | CTGAATCCATCGTCCAGCGT   |
| WRKY33       | CTCGTGGTAGCGGTTACGCC     | CCTTTGCTCTAGAGAATCCACC |
| ICS1         | CTCTCCAACCTCCATTCACTA    | TCTCCATCACAACCATTCA    |
| PR1          | CGAGAAGGCTAACTACAACCTACG | ACACCTCACTTTGGCACATC   |
| AOS1         | ATAACTGCGTGGTCTGAA       | ATAACTGCGTGGTCTGAA     |
| JAR1         | AACTGTGGTCTCAATGGAA      | GTAAGGCTCTAATTCAACATCA |
| SAG13        | GGGCTTGGGAGAGAACTCAA     | TGGCTAGTTCCTCCACCAC    |
| $\gamma$ VPE | AGTGGAAGGTTGTGGATAG      | CTCCAGGGCAATAGGTACC    |
